# Supplementary material
Source: PubMed Central journal article supplement (PMC3460690)
Supplement: supp_blood-2012-05-433797_blood-2012-05-433797-1.pdf [file supp_blood-2012-05-433797_blood-2012-05-433797-1.pdf]

## Supplementary Information

### Efficient Generation, Purification, and Expansion of CD34<sup>+</sup> Hematopoietic Progenitor Cells from Nonhuman Primate Induced Pluripotent Stem Cells

Jennifer L. Gori<sup>1</sup>, Devikha Chandrasekaran<sup>1</sup>, John P. Kowalski<sup>1</sup>, Jennifer E. Adair<sup>1</sup>, Brian C. Beard<sup>1,2</sup>, Sunita L. D'Souza<sup>3</sup>, Hans-Peter Kiem<sup>1,2,4</sup>

#### Inventory of Supplementary Information

##### Supplemental Methods

- There are two Supplemental Methods

Supplemental Data/Ordering relationships as follows:

Figure 5, related to Figure S1

##### Supplemental Data

- Supplemental Figure

There is 1 Supplemental Figure which is linked the main figures and related to the main figures as described below.

## **SUPPLEMENTAL METHODS**

### **Isolation and culture of macaque peripheral blood CD4<sup>+</sup> T lymphocytes**

Blood from pigtail macaque donors was layered on Lymphocyte Separation Medium (Cellgro), and mononuclear cells isolated according to the manufacturer's instructions. CD4<sup>+</sup> cells were isolated with the NHP CD4 micro-bead kit and MACS magnetic cell sorting according to the manufacturer's instructions (Miltenyi) and cultured in RPMI (Life Technologies) with 10% FBS, 25 mM HEPES, 50  $\mu$ M 2-mercaptoethanol, 1% each of non-essential amino acids, L-glutamine, sodium pyruvate and penicillin/streptomycin, IL-2 (100 U/mL) and IL-7 (5 ng/mL).

### **Macrophage-type cell culture**

MniPSC myeloid cells were collected from methylcellulose and were replated in DMEM (Life Technologies) containing 20% FBS and G-CSF (10 ng/mL).

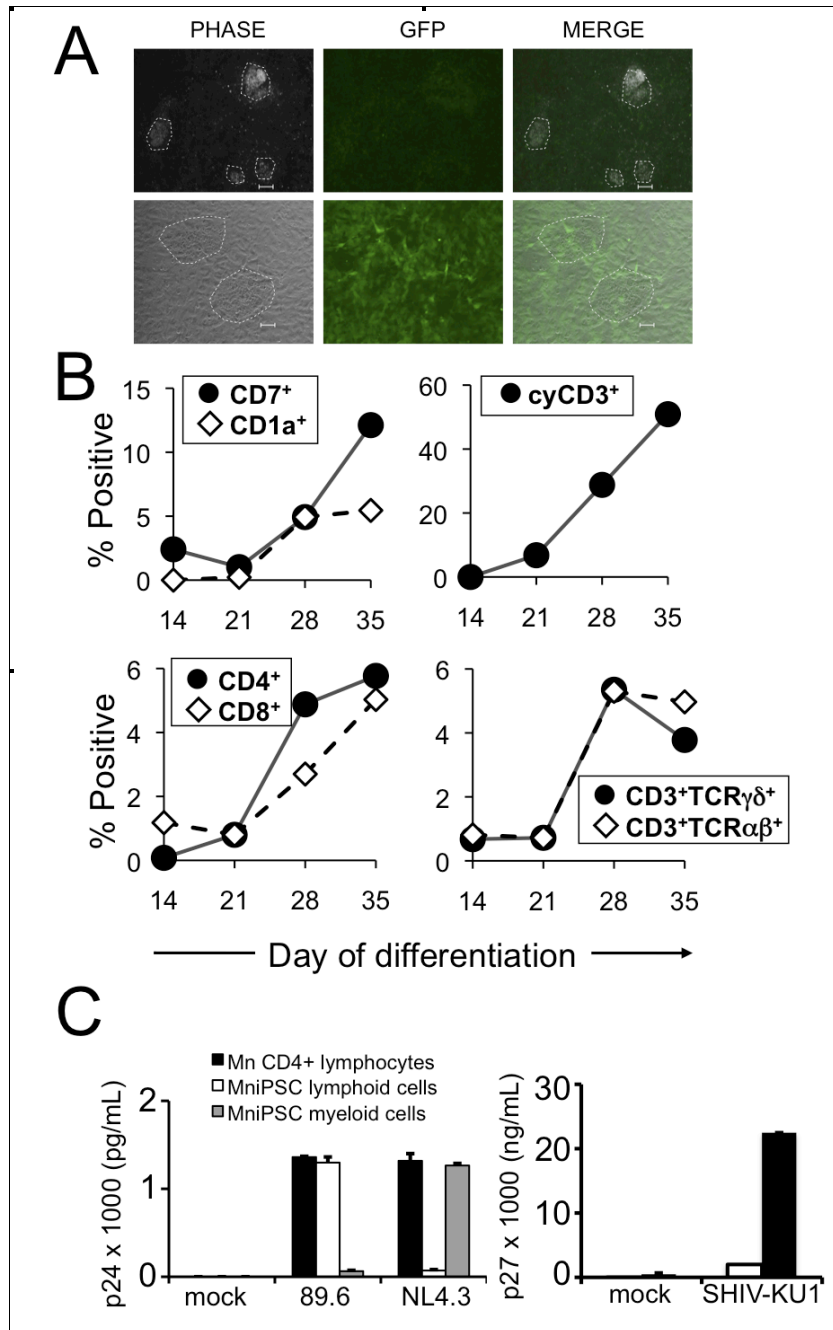

**Figure S1. Lymphoid differentiation of CD34<sup>+</sup> cells generated from MniPSCs** (Related to Figure 5). **(A)** MniPSC-derived GFP<sup>+</sup> lymphoid colonies on OP9DL1GFP stromal cells. **(B)** Detection of T lymphocyte phenotype markers by flow cytometry in MniPSC lymphoid cultures over the course of differentiation. The time points are relative to plating of the MniPSC derived CD34<sup>+</sup> cells in OP9DL1GFP co-culture. **(C)** Quantification of *Left Panel*: p24 HIV-1 viral antigen released into culture media of HIV-1 89.6 and NL4.3 infected cells. *Right Panel*: Quantification of p27 SIV viral antigen released into culture media of SHIV infected cells. Values represent mean ± SD from quadruplicate samples.
